# Supplementary material
Source: PubMed Central journal article supplement (PMC5956994)
Supplement: ADHM-6-na-s001.pdf [file ADHM-6-na-s001.pdf]

**ADVANCED  
HEALTHCARE  
MATERIALS**

Supporting Information

for *Adv. Healthcare Mater.*, DOI: 10.1002/adhm.201601095

Recapitulating the Micromechanical Behavior of Tension and Shear in a Biomimetic Hydrogel for Controlling Tenocyte Response

*Dharmesh Patel, Sadhana Sharma, Stephanie J. Bryant, and Hazel R. C. Screen\**

## Supporting Information

**Recapitulating the Micromechanical Behavior of Tension and Shear in a Biomimetic Hydrogel for Controlling Tenocyte Response***Dharmesh Patel, Sadhana Sharma, Stephanie J. Bryant and Hazel R. C. Screen\***Table S1: List of all materials used within study, including abbreviations and supplier details.*

| <b>Chemical or Material</b>                                                                                       | <b>Supplier</b>                          | <b>Product no.</b> |
|-------------------------------------------------------------------------------------------------------------------|------------------------------------------|--------------------|
| 5-([4,6-Dichlorotriazin-2-yl]amino)fluorescein hydrochloride (5-DTAF)                                             | Sigma Aldrich, UK                        | D0531              |
| Acridine Orange                                                                                                   | Invitrogen, USA                          | A1301              |
| Acrylate-PEG-NHS                                                                                                  | JenKem Technology, USA                   | A5022-1            |
| Bovine Serum Albumin (BSA)                                                                                        | Sigma Aldrich, UK                        | A3311              |
| Calcein AM                                                                                                        | Life Technologies, UK                    | C1430              |
| Chloroform                                                                                                        | Sigma Aldrich, UK                        | C2432              |
| Collagenase Type II                                                                                               | Worthington Biochemical Corporation, USA | CLS-2              |
| DAPI (4',6-Diamidino-2-Phenylindole, Dilactate) (DAPI)                                                            | Life Technologies, UK                    | D3571              |
| Dichloromethane                                                                                                   | Sigma Aldrich, UK                        | D65100             |
| Diethyl Ether                                                                                                     | VWR International Ltd, UK                | 23809.328          |
| Dispase Solution, 1U/mL                                                                                           | STEMCELL technologies, UK                | 07923              |
| Dulbecco's Modified Eagle Medium, low glucose (DMEM)                                                              | Life Technologies, UK                    | 11880              |
| Ethanol, 200 proof                                                                                                | Sigma Aldrich, UK                        | E7023              |
| Ethidium Homodimer                                                                                                | Life Technologies, UK                    | E1169              |
| FastStart Universal SYBR Green Master                                                                             | Roche Life Science, USA                  | 04913850001        |
| Foetal Bovine Serum (FBS)                                                                                         | Sigma Aldrich, UK                        | F7524              |
| HEPES, 1M                                                                                                         | Sigma Aldrich, UK                        | H0887              |
| Hydroquinone                                                                                                      | Sigma Aldrich, UK                        | H9003              |
| Irgacure 2959                                                                                                     | Ciba Speciality Chemicals, Switzerland   | Irgacure2959       |
| L-Glutamine, 200mM                                                                                                | Sigma Aldrich, UK                        | G7513              |
| Methacrylic Anhydride                                                                                             | Sigma Aldrich, UK                        | 27668-5            |
| MultiScribe Transcriptase Kit (including 10x sample buffer, Deoxynucleotide triphosphates, 25x RT Random Primers) | Life Technologies, UK                    | 4368814            |
| Non-essential amino acids                                                                                         | Sigma Aldrich, UK                        | M7145              |
| Paraformaldehyde                                                                                                  | Sigma Aldrich, UK                        | P6148              |
| Penicillin/Streptomycin, 10000U/10mg per mL                                                                       | Sigma Aldrich, UK                        | P4333              |
| Phalloidin (Alexa Fluor 488)                                                                                      | Life Technologies, UK                    | A12379             |
| Phase Lock Gel Heavy                                                                                              | 5 Prime GmbH, Germany                    | 232830             |
| Phosphate buffered saline (PBS)                                                                                   | Sigma Aldrich, UK                        | P5368              |
| Poly(ethylene glycol) (MW3000) (PEG)                                                                              | Merck Schuchardt, Germany                | 8.19015.1000       |
| Primers and Probes                                                                                                | Life Technologies, USA                   | Custom order       |
| QIAgen MiRneasy Micro Kit (including QIAzol lysis reagent and MinElute Spin Columns)                              | QIAgen, USA                              | 217084             |
| QIAshredder                                                                                                       | QIAgen, USA                              | 79654              |
| RNase Free Water                                                                                                  | Sigma Aldrich, UK                        | W4502              |
| Sodium Bicarbonate                                                                                                | Sigma Aldrich, UK                        | S-8875             |
| Triton X-100                                                                                                      | Sigma Aldrich, UK                        | X100               |

|                                            |             |                   |        |
|--------------------------------------------|-------------|-------------------|--------|
| Trypan Blue                                |             | Sigma Aldrich, UK | T8154  |
| Trypsin-EDTA (1X concentration)            |             | Sigma Aldrich, UK | T3924  |
| Tyrosine-Arginine-Glycine-Aspartic (YRGDS) | acid-Serine | GenScript, USA    | Custom |

Table S2: List of custom primers used for gene expression analysis (ordered from Life Technologies, USA).

| Gene                                    | Abbrev. | Primer Sequence |                                | Product Size (bp) |
|-----------------------------------------|---------|-----------------|--------------------------------|-------------------|
| Ribosomal protein L30                   | L30     | <b>Forward</b>  | 5'-GGCAGGCGGATTCTTTACC-3'      | 62                |
|                                         |         | <b>Reverse</b>  | 5'-TAGAGGCTTTCTCTCGGACAGATG-3' |                   |
| Matrix Metalloproteinase-3              | MMP-3   | <b>Forward</b>  | 5'-TCCGCCTTTCTCAGGATGAT-3'     | 62                |
|                                         |         | <b>Reverse</b>  | 5'-GGCACCACAGGGTCATTAGG3-'     |                   |
| Tissue Inhibitor of Metalloproteinase-3 | TIMP-3  | <b>Forward</b>  | 5'-AGTCTCTGTGGCCTTAAGCTTGA-3'  | 88                |
|                                         |         | <b>Reverse</b>  | 5'-TGGTCCACCTCTCTACAAAGTTAC-3' |                   |
| Tenomodulin                             | TNMD    | <b>Forward</b>  | 5'-TCTGGCGTGACGGGTCTT-3'       | 54                |
|                                         |         | <b>Reverse</b>  | 5'-AAAAAAGGCATTGAACAAAACGA-3'  |                   |
